# Supplementary material for: Frequency and predictors of estimated HIV transmissions and bacterial STI acquisition among HIV-positive patients in HIV care across three continents
Source: PubMed Central journal article supplement (PMC5043092; doi:10.7448/ias.19.1.21096), 2016-09-28
Supplement: JIAS-19-21096-s001.pdf [file JIAS-19-21096-s001.pdf]

**Supplemental Tables.**

**1. Principal Components Analysis: Four-factor Varimax rotated solutions**

| <b>Perceived Community Beliefs</b>                                                                                                               | <b>Factor 1:<br/>Power<br/>Imbalance<br/>and Condom<br/>Negotiation</b> | <b>Factor 2:<br/>Sexual<br/>Expectations<br/>and Beliefs</b> | <b>Factor 3:<br/>Negative<br/>Community<br/>Beliefs<br/>about HIV</b> | <b>Factor 4:<br/>Sexual<br/>Immorality</b> |
|--------------------------------------------------------------------------------------------------------------------------------------------------|-------------------------------------------------------------------------|--------------------------------------------------------------|-----------------------------------------------------------------------|--------------------------------------------|
| 9. Men fear that their partner(s) will leave them if they (the man) ask to use a condom.                                                         | <b>62</b>                                                               | 4                                                            | -14                                                                   | 5                                          |
| 12. It is harder for younger people to ask their partners to use a condom if their partner is older.                                             | <b>61</b>                                                               | 13                                                           | 1                                                                     | -6                                         |
| 11. Women are obligated to be submissive to their husbands, and therefore cannot ask their husbands to use condoms.                              | <b>58</b>                                                               | 4                                                            | 5                                                                     | -1                                         |
| 13. It is harder for people from a lower social status to ask their partners to use a condom if their partner is from a higher social status.    | <b>56</b>                                                               | 26                                                           | 9                                                                     | 1                                          |
| 14. It is harder for people from ethnic or racial minority communities to ask their partners to use a condom if their partner is not a minority. | <b>54</b>                                                               | -12                                                          | 17                                                                    | -1                                         |
| 10. Women fear that their partner(s) will leave them if they (the woman) ask to use a condom.                                                    | <b>51</b>                                                               | <b>46</b>                                                    | -3                                                                    | 11                                         |
| 8. There is an obligation to have children and therefore engage in unprotected sex.                                                              | <b>49</b>                                                               | 13                                                           | -21                                                                   | 20                                         |
| 15. People believe that only prostitutes use condoms.                                                                                            | <b>44</b>                                                               | -23                                                          | 17                                                                    | -5                                         |
| 16. The livelihood of individuals who engage in sex work is dependent on having unprotected sex.                                                 | <b>43</b>                                                               | -11                                                          | 15                                                                    | -9                                         |
| 7. There is an expectation to have unprotected sex once married.                                                                                 | 15                                                                      | <b>68</b>                                                    | 9                                                                     | 11                                         |
| 5. It is difficult to introduce condoms in a relationship when the couple has already been having unprotected sex.                               | 8                                                                       | <b>63</b>                                                    | 8                                                                     | -6                                         |
| 21. Sex workers will lose income if they disclose that they are HIV positive.                                                                    | -2                                                                      | <b>61</b>                                                    | 10                                                                    | 15                                         |
| 1. People believe it is prestigious for men to have multiple sex partners.                                                                       | -2                                                                      | <b>57</b>                                                    | 7                                                                     | -19                                        |
| 4. People believe that it is difficult for young people to have only one sexual partner.                                                         | 8                                                                       | <b>44</b>                                                    | 9                                                                     | -1                                         |
| 17. Condoms are not used often because they are too expensive.                                                                                   | 26                                                                      | <b>-49</b>                                                   | 9                                                                     | -25                                        |
| 20. People believe that women with HIV have engaged in sex with many partners.                                                                   | 6                                                                       | 17                                                           | <b>81</b>                                                             | -5                                         |

|                                                                                                                                                                         |                                         |                                         |                                           |                                           |
|-------------------------------------------------------------------------------------------------------------------------------------------------------------------------|-----------------------------------------|-----------------------------------------|-------------------------------------------|-------------------------------------------|
| 19. People believe that women with HIV have engaged in prostitution.                                                                                                    | 12                                      | 9                                       | <b>81</b>                                 | -2                                        |
| 18. It is believed that people with HIV have contracted the disease because they have engaged in immoral behavior.                                                      | 5                                       | 14                                      | <b>71</b>                                 | 11                                        |
| 2. People believe that men who have sex with multiple partners are immoral.                                                                                             | 28                                      | -27                                     | 4                                         | <b>70</b>                                 |
| 3. People believe that women who have sex with multiple partners are immoral.                                                                                           | 3                                       | 35                                      | 6                                         | <b>64</b>                                 |
| 22. People believe that women cannot transmit HIV to others.                                                                                                            | 11                                      | -5                                      | -1                                        | <b>-56</b>                                |
| 6. Asking to use a condom suggests that you distrust your partner.                                                                                                      | 39                                      | 33                                      | 9                                         | 11                                        |
| 23. People who feel better after taking ART are more likely to have unsafe sex.                                                                                         | 37                                      | 1                                       | 10                                        | -31                                       |
| <b>Personal Beliefs</b>                                                                                                                                                 | <b>Factor 1:</b><br>Sexual<br>Practices | <b>Factor 2:</b><br>Partner<br>Concerns | <b>Factor 3:</b><br>Viral load<br>Beliefs | <b>Factor 4:</b><br>Dislike of<br>Condoms |
| 29. I only have sex with other HIV-infected people.                                                                                                                     | <b>69</b>                               | 0                                       | 4                                         | -11                                       |
| 39. I find it difficult to find a place to get condoms.                                                                                                                 | <b>68</b>                               | 3                                       | 9                                         | 11                                        |
| 31. I only engage in unprotected sex in order to have a baby.                                                                                                           | <b>62</b>                               | 16                                      | 4                                         | -12                                       |
| 30. I believe that condoms will protect me from STIs.                                                                                                                   | <b>-61</b>                              | -8                                      | -17                                       | 5                                         |
| 38. I am embarrassed to get condoms at the store.                                                                                                                       | <b>60</b>                               | 22                                      | 7                                         | 22                                        |
| 27. If I have unprotected sex with another HIV-infected person, I can acquire their type of the HIV virus.                                                              | <b>-54</b>                              | 12                                      | -26                                       | 2                                         |
| 32. I will lose status in my community if I am not a father or mother.                                                                                                  | <b>50</b>                               | 31                                      | -12                                       | 10                                        |
| 26. Since HIV is treatable, I do not believe that it is important for me to use condoms.                                                                                | <b>50</b>                               | 1                                       | <b>50</b>                                 | 14                                        |
| 28. If I am the receptive partner during sex (in other words, my partner is putting his penis inside of my mouth, anus, or vagina) I cannot transmit HIV to my partner. | <b>50</b>                               | -7                                      | 46                                        | 1                                         |
| 34. My partner(s) will think I am unfaithful if I ask to use a condom.                                                                                                  | 24                                      | <b>85</b>                               | 6                                         | 0                                         |
| 35. My partner(s) will think that I believe they are unfaithful if I ask to use a condom.                                                                               | 18                                      | <b>84</b>                               | 2                                         | 4                                         |
| 33. My partner(s) pressures me to have unprotected sex.                                                                                                                 | -9                                      | <b>52</b>                               | 8                                         | 8                                         |
| 25. I am more likely to engage in unsafe sex if I know that the amount of the HIV virus in my blood is undetectable.                                                    | 9                                       | 14                                      | <b>80</b>                                 | 13                                        |
| 24. I can't transmit HIV if the amount of the HIV virus in my blood is undetectable.                                                                                    | 9                                       | 7                                       | <b>84</b>                                 | 5                                         |

|                                                                       |     |    |    |           |
|-----------------------------------------------------------------------|-----|----|----|-----------|
| 37. I feel that condoms make sex less pleasurable.                    | -13 | -5 | 13 | <b>83</b> |
| 36. I believe that using condoms decreases intimacy between partners. | 14  | 20 | 6  | <b>81</b> |

*Note: Values are multiplied by 100 and rounded to the nearest integer.*
